# Supplementary material
Source: Royal Society of Chemistry journal article supplement (doi:10.1039/d6re00099a)
Supplement: d6re00099a1.pdf [file d6re00099a1.pdf]

## Supporting information

### **A Robust Co/SiO<sub>2</sub> Catalyst for Sustainable Sorbitol Production: From Batch to Continuous Flow**

Xincheng Wang,\* Bangxian Long, Yuxin Liang, Yuze Peng, Haofei Yang, Lei Wang,  
Miaomiao Chen, Ruomeng Li, Songqi Tai

(Beijing Key Laboratory of Enze Biomass Fine Chemicals, College of New Materials  
and Chemical Engineering, Beijing Institute of Petrochemical Technology, Beijing  
102617, PR China)

#### **Contents**

**Fig. S1** N<sub>2</sub> adsorption-desorption isotherm and pore size distribution of SiO<sub>2</sub> catalyst.

**Fig. S2** Comparison of product yield over 10% Ni supported on different supports.

**Fig. S3** Comparison of Catalytic Performance of 20% Ni Supported on two different supports.

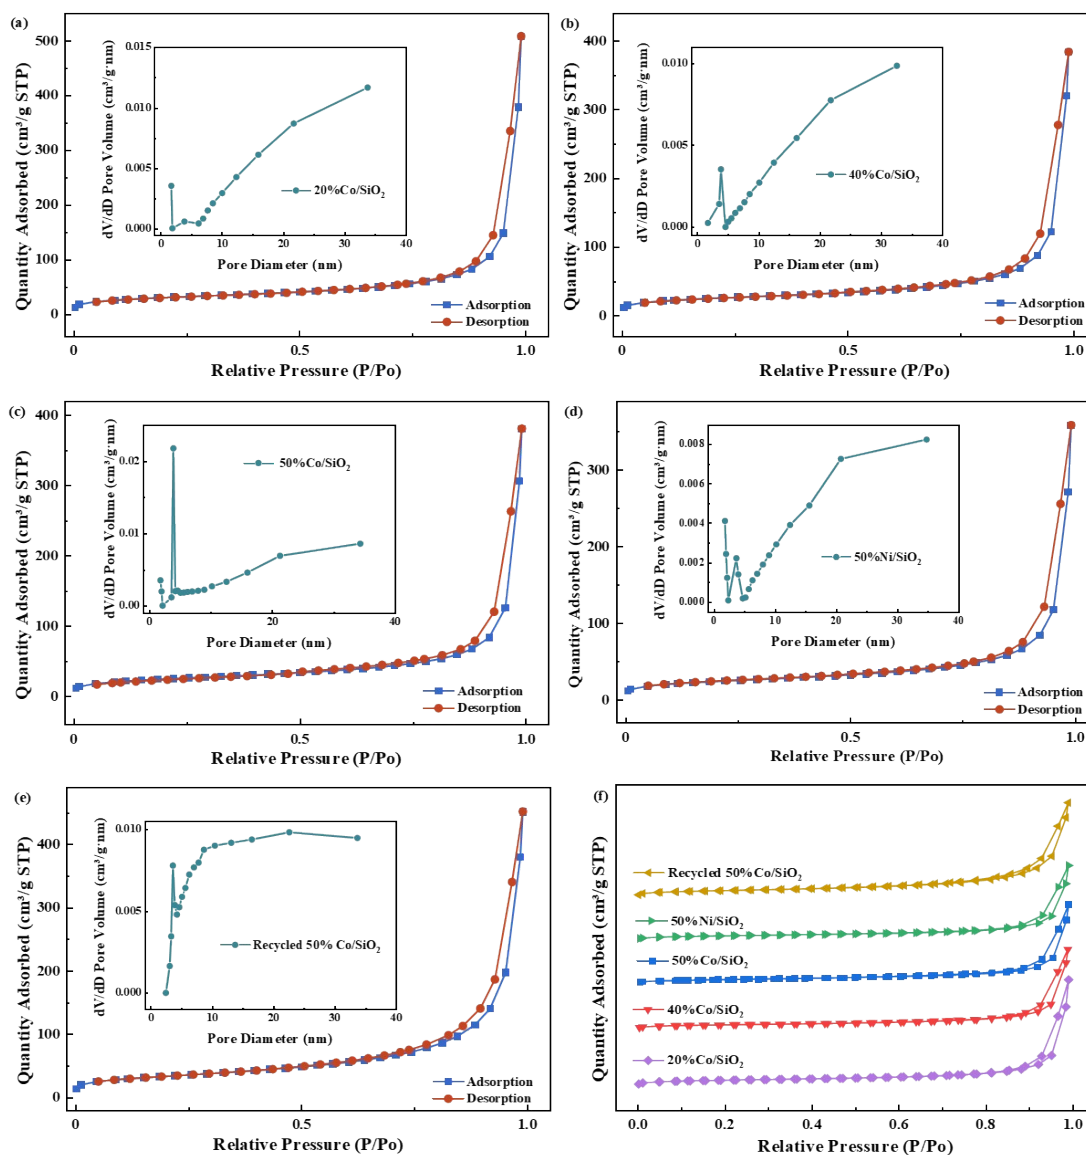

**Fig. S1** N<sub>2</sub> adsorption-desorption isotherm and pore size distribution of SiO<sub>2</sub> catalyst: (1) 20% Co/SiO<sub>2</sub>, (2) 40% Co/SiO<sub>2</sub>, (3) 50% Co/SiO<sub>2</sub>, (4) 50% Ni/SiO<sub>2</sub>, (5) Recycled 50% Co/SiO<sub>2</sub>, (6) SiO<sub>2</sub> catalysts with different loadings.

### Effect of the Support on Reaction Activity

Given the widespread application of nickel in conventional hydrogenation processes, metallic Ni was employed to screen suitable supports. Catalysts with a uniform Ni loading of 10% were prepared via the incipient wetness impregnation method. The catalytic performance was evaluated in a 10 wt% glucose solution after 1 hour of reaction, as shown in Fig. S2.

When Al<sub>2</sub>O<sub>3</sub>, SiO<sub>2</sub>, or  $\beta$  zeolite were used as supports, the catalysts exhibited superior performance compared to others, with no significant by-products detected. This indicates that these three supports effectively disperse the Ni active species,

forming selective active sites that promote the directed hydrogenation of glucose to sorbitol while suppressing side reactions.

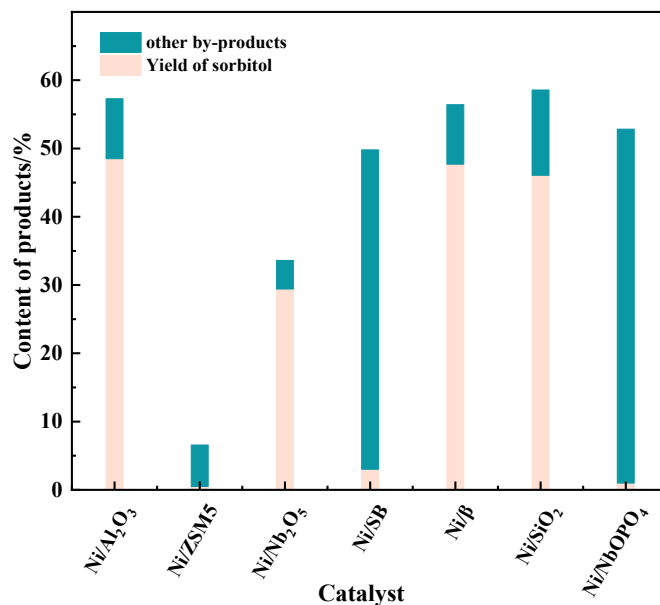

**Fig. S2** Comparison of product yield over 10% Ni supported on different supports. Reaction conditions: 2 g catalyst, 5 MPa H<sub>2</sub>, 145 °C, 10 wt% glucose solution.

Since Al<sub>2</sub>O<sub>3</sub>, SiO<sub>2</sub>, and β zeolite exhibited comparable catalytic performance, the Ni loading was increased to 20% to investigate the effect of higher loading on these three catalysts, thereby screening for a more efficient catalyst support.

**Fig. S3** Comparison of Catalytic Performance of 20% Ni Supported on two different supports: (a) glucose(10 wt%) conversion, (b) sorbitol yield as a function of time. Reaction conditions: 2 g catalyst, 5 MPa H<sub>2</sub>, 145 °C.

After increasing the Ni content, the catalytic performance of all catalysts improved (Fig. S3). Among the three supports, the catalyst with SiO<sub>2</sub> demonstrated significantly superior performance compared to those with Al<sub>2</sub>O<sub>3</sub> and β zeolite, achieving a glucose conversion of 80.2% and a sorbitol yield of 77.3%. This enhanced activity may be attributed to the high specific surface area and suitable pore structure of the SiO<sub>2</sub> support, which can provide more active sites and facilitate reactant diffusion. The advantage of SiO<sub>2</sub> became more pronounced at the elevated loading of 20%, as it enabled better dispersion of metallic Ni, thereby

increasing the number of accessible active sites.
